# Supplementary material for: Novel recognition motifs and biological functions of the RNA-binding protein HuD revealed by genome-wide identification of its targets
Source: PubMed Central journal article supplement — Nucleic Acids Res. 2009 Oct 21;38(1):117–30. doi: 10.1093/nar/gkp863 (PMC2800223; doi:10.1093/nar/gkp863), 2009-10-21
Supplement: gkp863_1.pdf [file gkp863_1.pdf]

|                     |      |       |       |       |       |   |    |   |   |   |   |   |   |   |    |   |
|---------------------|------|-------|-------|-------|-------|---|----|---|---|---|---|---|---|---|----|---|
| ENSMUSG00000026878  | 3522 | 27.65 | 32.34 | 18.94 | 21.07 | 0 | 6  | 0 | 0 | 0 | 0 | 0 | 0 | 0 | 10 | 1 |
| ENSMUSG00000022285  | 1948 | 24.79 | 35.32 | 20.89 | 18.99 | 0 | 6  | 0 | 0 | 0 | 0 | 0 | 0 | 0 | 74 | 0 |
| ENSMUSG00000035033  | 1673 | 23.37 | 34.37 | 23.67 | 18.59 | 0 | 3  | 0 | 0 | 0 | 0 | 0 | 0 | 0 | 20 | 0 |
| ENSMUSG00000069662  | 1287 | 28.98 | 36.05 | 17.02 | 17.95 | 0 | 1  | 0 | 0 | 0 | 0 | 0 | 0 | 0 | 67 | 1 |
| ENSMUSG00000028211  | 4418 | 28.25 | 35.20 | 17.18 | 19.38 | 1 | 8  | 1 | 0 | 0 | 0 | 0 | 0 | 0 | 12 | 1 |
| ENSMUSG00000074781  | 3346 | 27.17 | 33.29 | 19.19 | 20.35 | 0 | 5  | 0 | 0 | 0 | 0 | 0 | 0 | 0 | 3  | 0 |
| ENSMUSG00000027879  | 1048 | 22.14 | 36.83 | 19.85 | 21.18 | 0 | 2  | 0 | 0 | 0 | 0 | 0 | 0 | 0 | 86 | 1 |
| ENSMUSG00000050953  | 1720 | 28.43 | 33.55 | 17.33 | 20.70 | 0 | 4  | 0 | 0 | 0 | 0 | 0 | 0 | 0 | 31 | 0 |
| ENSMUSG00000020029  | 1999 | 28.36 | 32.17 | 20.21 | 19.26 | 0 | 5  | 0 | 0 | 0 | 0 | 0 | 0 | 0 | 3  | 0 |
| ENSMUSG00000047514  | 1465 | 26.83 | 33.65 | 20.27 | 19.25 | 0 | 5  | 0 | 0 | 0 | 0 | 0 | 0 | 0 | 15 | 0 |
| ENSMUSG00000027805  | 1312 | 25.15 | 34.76 | 19.89 | 20.20 | 0 | 4  | 0 | 0 | 0 | 0 | 0 | 0 | 0 | 0  | 0 |
| ENSMUSG00000019831  | 767  | 27.77 | 36.90 | 16.30 | 19.04 | 0 | 0  | 0 | 0 | 0 | 0 | 0 | 0 | 0 | 15 | 0 |
| ENSMUSG00000000296  | 461  | 27.33 | 33.19 | 21.04 | 18.44 | 0 | 5  | 1 | 0 | 0 | 0 | 0 | 0 | 0 | 0  | 0 |
| ENSMUSG00000028646  | 1304 | 24.85 | 28.37 | 23.16 | 23.62 | 0 | 5  | 0 | 0 | 0 | 0 | 0 | 0 | 0 | 0  | 0 |
| ENSMUSG00000019883  | 1914 | 33.39 | 30.98 | 19.07 | 16.56 | 0 | 10 | 0 | 0 | 0 | 0 | 0 | 0 | 0 | 0  | 0 |
| ENSMUSG00000028633  | 790  | 22.91 | 33.92 | 19.75 | 23.42 | 0 | 1  | 0 | 0 | 0 | 0 | 0 | 0 | 0 | 0  | 0 |
| ENSMUSG000000047187 | 1199 | 27.52 | 34.78 | 18.77 | 18.93 | 0 | 1  | 0 | 0 | 0 | 0 | 0 | 0 | 0 | 0  | 0 |
| ENSMUSG00000028691  | 255  | 24.31 | 34.12 | 21.18 | 20.39 | 0 | 0  | 0 | 0 | 0 | 0 | 0 | 0 | 0 | 9  | 0 |
| ENSMUSG00000020248  | 3024 | 25.30 | 32.47 | 18.85 | 23.38 | 1 | 7  | 1 | 0 | 0 | 0 | 0 | 0 | 0 | 17 | 0 |
| ENSMUSG00000001441  | 1254 | 28.71 | 27.83 | 22.57 | 20.89 | 0 | 0  | 0 | 0 | 0 | 0 | 0 | 0 | 0 | 6  | 0 |
| ENSMUSG000000019998 | 1239 | 25.34 | 37.85 | 17.19 | 19.61 | 2 | 5  | 1 | 0 | 0 | 0 | 1 | 0 | 0 | 0  | 0 |
| ENSMUSG000000055733 | 820  | 31.34 | 38.54 | 13.78 | 16.34 | 0 | 3  | 0 | 0 | 0 | 0 | 0 | 1 | 0 | 0  | 0 |
| ENSMUSG00000027993  | 4658 | 29.52 | 31.43 | 18.48 | 20.57 | 0 | 12 | 0 | 1 | 0 | 0 | 0 | 0 | 0 | 13 | 1 |
| ENSMUSG00000037643  | 2460 | 27.11 | 33.21 | 18.82 | 20.85 | 1 | 9  | 1 | 1 | 0 | 0 | 0 | 0 | 0 | 25 | 0 |
| ENSMUSG000000053192 | 1048 | 28.82 | 31.30 | 20.90 | 18.99 | 4 | 8  | 2 | 3 | 1 | 2 | 3 | 3 | 3 | 4  | 1 |
| ENSMUSG00000028552  | 2185 | 29.89 | 34.60 | 17.21 | 18.31 | 0 | 6  | 0 | 0 | 0 | 0 | 0 | 0 | 0 | 11 | 0 |
| ENSMUSG00000025555  | 1335 | 22.47 | 27.27 | 26.22 | 24.04 | 0 | 1  | 0 | 0 | 0 | 0 | 0 | 0 | 0 | 0  | 0 |
| ENSMUSG00000028232  | 1204 | 28.57 | 38.12 | 14.95 | 18.36 | 1 | 6  | 0 | 0 | 0 | 0 | 0 | 0 | 0 | 0  | 0 |
| ENSMUSG00000020607  | 2247 | 24.43 | 29.95 | 22.56 | 23.05 | 0 | 4  | 0 | 0 | 0 | 0 | 0 | 0 | 0 | 31 | 0 |
| ENSMUSG00000028134  | 1328 | 28.92 | 38.40 | 13.25 | 19.43 | 0 | 6  | 0 | 0 | 0 | 0 | 0 | 0 | 0 | 17 | 0 |
| ENSMUSG00000060628  | 1108 | 29.78 | 36.73 | 14.35 | 19.13 | 2 | 3  | 0 | 0 | 0 | 0 | 0 | 0 | 1 | 4  | 0 |
| ENSMUSG00000027162  | 778  | 29.43 | 39.20 | 16.45 | 14.91 | 0 | 7  | 0 | 0 | 0 | 0 | 0 | 0 | 0 | 0  | 0 |
| ENSMUSG00000000787  | 1121 | 30.87 | 31.31 | 18.20 | 19.63 | 0 | 3  | 0 | 0 | 0 | 0 | 0 | 0 | 0 | 0  | 0 |
| ENSMUSG00000030042  | 292  | 23.63 | 30.48 | 22.60 | 23.29 | 0 | 0  | 0 | 0 | 0 | 0 | 0 | 0 | 0 | 0  | 0 |
| ENSMUSG00000030629  | 766  | 26.50 | 38.64 | 15.40 | 19.45 | 0 | 3  | 0 | 0 | 0 | 0 | 0 | 0 | 0 | 8  | 0 |
| ENSMUSG00000026753  | 543  | 23.02 | 37.20 | 21.18 | 18.60 | 0 | 2  | 0 | 0 | 0 | 0 | 0 | 0 | 0 | 0  | 0 |
| ENSMUSG00000032217  | 1561 | 28.32 | 37.60 | 16.85 | 17.23 | 0 | 7  | 0 | 1 | 0 | 0 | 0 | 0 | 0 | 56 | 0 |
| ENSMUSG00000025040  | 1362 | 28.05 | 37.59 | 17.25 | 17.11 | 0 | 2  | 0 | 1 | 0 | 0 | 0 | 0 | 0 | 0  | 0 |
| ENSMUSG00000028156  | 1128 | 26.06 | 35.28 | 20.74 | 17.91 | 0 | 3  | 0 | 0 | 0 | 0 | 0 | 0 | 0 | 15 | 0 |
| ENSMUSG00000032115  | 970  | 19.07 | 28.14 | 27.42 | 25.36 | 0 | 1  | 0 | 0 | 0 | 0 | 0 | 0 | 0 | 0  | 0 |
| ENSMUSG00000025139  | 973  | 22.10 | 28.47 | 26.21 | 23.23 | 0 | 0  | 0 | 0 | 0 | 0 | 0 | 0 | 0 | 0  | 0 |
| ENSMUSG00000022664  | 2574 | 29.88 | 34.34 | 17.52 | 18.26 | 0 | 5  | 0 | 0 | 0 | 0 | 0 | 0 | 0 | 6  | 4 |
| ENSMUSG00000024493  | 163  | 23.93 | 38.04 | 20.25 | 17.79 | 0 | 0  | 0 | 0 | 0 | 0 | 0 | 0 | 0 | 0  | 0 |
| ENSMUSG00000032262  | 1006 | 28.93 | 33.80 | 17.69 | 19.58 | 0 | 6  | 0 | 1 | 0 | 0 | 0 | 0 | 0 | 5  | 0 |
| ENSMUSG00000027438  | 2104 | 25.81 | 31.32 | 20.77 | 22.10 | 0 | 1  | 0 | 0 | 0 | 0 | 0 | 0 | 0 | 0  | 1 |
| ENSMUSG000000042363 | 2790 | 29.71 | 31.00 | 18.82 | 20.47 | 2 | 12 | 1 | 0 | 0 | 0 | 1 | 2 | 2 | 20 | 0 |
| ENSMUSG00000033454  | 1067 | 30.74 | 41.52 | 12.18 | 15.56 | 0 | 6  | 0 | 0 | 0 | 0 | 0 | 0 | 1 | 42 | 0 |
| ENSMUSG00000056666  | 1033 | 30.40 | 27.59 | 21.78 | 20.23 | 0 | 1  | 0 | 0 | 0 | 0 | 0 | 0 | 1 | 0  | 0 |
| ENSMUSG00000051853  | 2706 | 15.93 | 31.97 | 26.35 | 25.76 | 0 | 2  | 0 | 0 | 0 | 0 | 0 | 0 | 0 | 0  | 0 |
| ENSMUSG00000032481  | 2396 | 23.50 | 30.88 | 23.21 | 22.41 | 0 | 2  | 0 | 0 | 0 | 0 | 0 | 0 | 0 | 61 | 2 |
| ENSMUSG00000028719  | 1074 | 28.12 | 37.80 | 15.74 | 18.34 | 0 | 3  | 0 | 0 | 0 | 0 | 0 | 0 | 0 | 7  | 0 |
| ENSMUSG00000022321  | 552  | 30.80 | 35.33 | 17.93 | 15.94 | 2 | 3  | 0 | 0 | 0 | 0 | 0 | 0 | 1 | 10 | 0 |
| ENSMUSG00000030759  | 125  | 37.60 | 29.60 | 16.00 | 16.80 | 0 | 1  | 0 | 0 | 0 | 0 | 0 | 0 | 0 | 0  | 0 |
| ENSMUSG000000024083 | 403  | 31.02 | 31.02 | 20.84 | 17.12 | 0 | 1  | 0 | 0 | 0 | 0 | 0 | 0 | 1 | 0  | 0 |
| ENSMUSG00000038633  | 782  | 26.34 | 32.61 | 19.57 | 21.48 | 0 | 1  | 0 | 0 | 0 | 0 | 0 | 0 | 0 | 0  | 0 |
| ENSMUSG00000025059  | 2449 | 30.71 | 35.32 | 17.97 | 16.01 | 0 | 7  | 0 | 0 | 0 | 0 | 0 | 0 | 0 | 15 | 0 |
| ENSMUSG00000043991  | 122  | 52.46 | 11.48 | 25.41 | 10.66 | 0 | 0  | 0 | 0 | 0 | 0 | 0 | 0 | 0 | 0  | 0 |
| ENSMUSG000000024480 | 462  | 28.79 | 37.23 | 16.45 | 17.53 | 0 | 1  | 0 | 0 | 0 | 0 | 0 | 0 | 0 | 19 | 0 |
| ENSMUSG00000027822  | 914  | 32.93 | 37.09 | 13.02 | 16.96 | 0 | 7  | 0 | 0 | 0 | 0 | 0 | 0 | 1 | 0  | 0 |
| ENSMUSG00000037416  | 2688 | 34.41 | 35.83 | 14.21 | 15.55 | 1 | 16 | 0 | 1 | 0 | 0 | 0 | 0 | 2 | 8  | 0 |
| ENSMUSG00000021264  | 976  | 31.45 | 35.55 | 15.16 | 17.83 | 0 | 3  | 0 | 0 | 0 | 0 | 0 | 0 | 1 | 0  | 0 |

|                     |      |       |       |       |       |   |    |   |   |   |   |   |   |   |     |   |
|---------------------|------|-------|-------|-------|-------|---|----|---|---|---|---|---|---|---|-----|---|
| ENSMUSG00000061666  | 1275 | 27.14 | 30.67 | 19.14 | 23.06 | 0 | 2  | 0 | 0 | 0 | 0 | 0 | 0 | 0 | 1   | 0 |
| ENSMUSG00000028221  | 1393 | 29.22 | 36.47 | 16.73 | 17.59 | 1 | 7  | 0 | 0 | 0 | 0 | 0 | 0 | 0 | 26  | 0 |
| ENSMUSG00000040242  | 1766 | 31.26 | 31.65 | 17.33 | 19.76 | 0 | 6  | 0 | 0 | 0 | 0 | 0 | 0 | 0 | 1   | 0 |
| ENSMUSG00000055717  | 884  | 28.51 | 34.73 | 18.67 | 18.10 | 0 | 4  | 0 | 0 | 0 | 0 | 0 | 0 | 0 | 3   | 0 |
| ENSMUSG00000024603  | 2321 | 26.45 | 31.37 | 20.98 | 21.20 | 0 | 1  | 0 | 0 | 0 | 0 | 0 | 0 | 0 | 22  | 2 |
| ENSMUSG00000032437  | 162  | 24.07 | 30.25 | 24.07 | 21.60 | 0 | 1  | 0 | 0 | 0 | 0 | 0 | 0 | 0 | 0   | 0 |
| ENSMUSG00000028233  | 1616 | 26.86 | 34.65 | 18.56 | 19.93 | 0 | 1  | 0 | 0 | 0 | 0 | 0 | 0 | 0 | 28  | 0 |
| ENSMUSG00000027088  | 996  | 31.02 | 28.01 | 19.68 | 21.29 | 0 | 0  | 0 | 0 | 0 | 0 | 0 | 0 | 0 | 0   | 0 |
| ENSMUSG00000016559  | 1495 | 29.23 | 35.45 | 15.65 | 19.67 | 0 | 4  | 0 | 0 | 0 | 0 | 0 | 0 | 0 | 0   | 0 |
| ENSMUSG00000025979  | 267  | 30.34 | 40.45 | 12.36 | 16.85 | 0 | 0  | 0 | 0 | 0 | 0 | 0 | 0 | 0 | 0   | 0 |
| ENSMUSG00000027351  | 2332 | 29.29 | 35.76 | 16.42 | 18.52 | 0 | 7  | 0 | 1 | 0 | 0 | 0 | 0 | 0 | 1   | 0 |
| ENSMUSG00000034724  | 1443 | 29.80 | 35.90 | 16.98 | 17.33 | 0 | 5  | 0 | 0 | 0 | 0 | 0 | 0 | 0 | 33  | 1 |
| ENSMUSG00000049536  | 564  | 32.27 | 38.83 | 13.48 | 15.43 | 1 | 3  | 0 | 0 | 0 | 0 | 0 | 0 | 0 | 8   | 0 |
| ENSMUSG00000021936  | 4410 | 27.71 | 33.92 | 18.78 | 19.59 | 0 | 7  | 0 | 0 | 0 | 0 | 0 | 0 | 1 | 12  | 1 |
| ENSMUSG00000058317  | 714  | 21.15 | 37.11 | 21.43 | 20.31 | 0 | 1  | 0 | 0 | 0 | 0 | 0 | 0 | 0 | 30  | 0 |
| ENSMUSG00000019817  | 233  | 25.75 | 40.34 | 16.74 | 17.17 | 0 | 2  | 0 | 0 | 0 | 0 | 0 | 0 | 0 | 0   | 0 |
| ENSMUSG00000022451  | 1702 | 27.79 | 30.43 | 19.98 | 21.80 | 0 | 0  | 0 | 0 | 0 | 0 | 0 | 0 | 0 | 45  | 0 |
| ENSMUSG00000032368  | 997  | 27.58 | 31.49 | 18.25 | 22.67 | 0 | 3  | 0 | 0 | 0 | 0 | 0 | 0 | 0 | 33  | 1 |
| ENSMUSG00000032839  | 113  | 40.71 | 32.74 | 15.04 | 11.50 | 0 | 0  | 0 | 0 | 0 | 0 | 0 | 0 | 0 | 0   | 0 |
| ENSMUSG00000020265  | 1162 | 22.20 | 31.15 | 21.17 | 25.47 | 0 | 0  | 0 | 0 | 0 | 0 | 0 | 0 | 0 | 4   | 0 |
| ENSMUSG00000015733  | 1094 | 27.70 | 35.65 | 17.92 | 18.74 | 0 | 3  | 0 | 0 | 0 | 0 | 0 | 0 | 0 | 0   | 0 |
| ENSMUSG00000028245  | 2815 | 27.35 | 26.32 | 22.34 | 23.98 | 0 | 2  | 0 | 0 | 0 | 0 | 0 | 0 | 0 | 0   | 0 |
| ENSMUSG00000028249  | 1558 | 26.06 | 35.24 | 19.70 | 19.00 | 0 | 4  | 0 | 0 | 0 | 0 | 0 | 0 | 0 | 0   | 0 |
| ENSMUSG00000001017  | 946  | 25.69 | 33.83 | 18.92 | 21.56 | 0 | 2  | 0 | 0 | 0 | 0 | 0 | 0 | 0 | 0   | 0 |
| ENSMUSG00000026430  | 2294 | 25.41 | 27.94 | 24.06 | 22.58 | 0 | 4  | 0 | 1 | 0 | 0 | 0 | 0 | 0 | 3   | 0 |
| ENSMUSG00000031167  | 620  | 31.45 | 35.81 | 14.68 | 18.06 | 0 | 2  | 0 | 0 | 0 | 0 | 0 | 0 | 0 | 0   | 0 |
| ENSMUSG00000025935  | 1621 | 26.84 | 37.63 | 18.01 | 17.52 | 0 | 4  | 0 | 0 | 0 | 0 | 0 | 0 | 0 | 58  | 0 |
| ENSMUSG00000022885  | 2473 | 23.70 | 28.51 | 23.53 | 24.26 | 0 | 1  | 0 | 0 | 0 | 0 | 0 | 0 | 0 | 6   | 0 |
| ENSMUSG000000056429 | 3685 | 25.51 | 32.75 | 20.49 | 21.25 | 1 | 5  | 0 | 0 | 0 | 0 | 0 | 0 | 0 | 5   | 0 |
| ENSMUSG00000021610  | 486  | 22.63 | 29.63 | 24.90 | 22.84 | 0 | 0  | 0 | 0 | 0 | 0 | 0 | 0 | 0 | 0   | 0 |
| ENSMUSG00000041417  | 4119 | 25.83 | 32.27 | 19.45 | 22.46 | 0 | 7  | 0 | 0 | 0 | 0 | 0 | 0 | 0 | 106 | 0 |
| ENSMUSG00000038482  | 1157 | 27.05 | 35.70 | 18.58 | 18.67 | 0 | 3  | 0 | 0 | 0 | 0 | 0 | 0 | 0 | 33  | 1 |
| ENSMUSG00000026893  | 2519 | 29.38 | 36.13 | 17.15 | 17.35 | 1 | 8  | 0 | 0 | 0 | 0 | 0 | 0 | 0 | 16  | 1 |
| ENSMUSG00000031715  | 1117 | 29.63 | 40.47 | 13.07 | 16.83 | 1 | 4  | 0 | 0 | 0 | 0 | 0 | 0 | 0 | 17  | 0 |
| ENSMUSG00000008489  | 2477 | 30.28 | 36.29 | 14.45 | 18.97 | 0 | 15 | 0 | 0 | 0 | 0 | 0 | 0 | 1 | 21  | 0 |
| ENSMUSG00000068856  | 222  | 22.52 | 40.99 | 23.42 | 13.06 | 0 | 0  | 0 | 0 | 0 | 0 | 0 | 0 | 0 | 0   | 0 |
| ENSMUSG00000022421  | 4084 | 21.43 | 25.12 | 25.56 | 27.89 | 0 | 2  | 0 | 0 | 0 | 0 | 0 | 0 | 0 | 14  | 1 |
| ENSMUSG00000022378  | 2519 | 28.34 | 32.47 | 18.66 | 20.52 | 1 | 7  | 0 | 0 | 0 | 0 | 0 | 0 | 2 | 0   | 0 |
| ENSMUSG00000019889  | 385  | 25.45 | 32.73 | 20.26 | 21.56 | 0 | 0  | 0 | 0 | 0 | 0 | 0 | 0 | 0 | 0   | 0 |
| ENSMUSG00000028399  | 3719 | 30.98 | 33.34 | 18.07 | 17.61 | 0 | 5  | 0 | 0 | 0 | 0 | 0 | 0 | 0 | 27  | 1 |
| ENSMUSG00000029405  | 267  | 28.09 | 37.08 | 16.10 | 18.73 | 0 | 1  | 0 | 0 | 0 | 0 | 0 | 0 | 0 | 0   | 0 |
| ENSMUSG00000039419  | 2755 | 29.73 | 31.03 | 20.69 | 18.55 | 0 | 5  | 0 | 0 | 0 | 0 | 0 | 0 | 0 | 0   | 0 |
| ENSMUSG00000020300  | 4102 | 29.99 | 35.67 | 16.63 | 17.72 | 0 | 17 | 1 | 0 | 0 | 0 | 0 | 0 | 0 | 12  | 0 |
| ENSMUSG00000025920  | 1500 | 26.47 | 33.87 | 21.60 | 18.07 | 0 | 6  | 0 | 0 | 0 | 0 | 0 | 0 | 0 | 0   | 0 |
| ENSMUSG00000027963  | 1497 | 26.85 | 33.27 | 19.37 | 20.51 | 0 | 1  | 0 | 0 | 0 | 0 | 0 | 0 | 0 | 13  | 0 |
| ENSMUSG00000009030  | 1755 | 28.15 | 37.15 | 16.18 | 18.52 | 0 | 7  | 0 | 1 | 0 | 0 | 0 | 0 | 0 | 5   | 0 |
| ENSMUSG00000059742  | 9532 | 33.02 | 30.06 | 18.19 | 18.74 | 2 | 36 | 0 | 1 | 0 | 0 | 0 | 0 | 2 | 3   | 0 |
| ENSMUSG00000026872  | 4939 | 32.74 | 34.04 | 17.07 | 16.16 | 1 | 26 | 0 | 0 | 0 | 0 | 0 | 0 | 2 | 33  | 0 |
| ENSMUSG00000027439  | 1898 | 27.92 | 30.14 | 19.97 | 21.97 | 0 | 6  | 0 | 0 | 0 | 0 | 0 | 0 | 0 | 0   | 0 |
| ENSMUSG00000022270  | 1641 | 30.59 | 33.21 | 17.79 | 18.40 | 1 | 4  | 1 | 0 | 0 | 0 | 0 | 0 | 0 | 26  | 0 |
| ENSMUSG00000049647  | 7313 | 30.07 | 32.00 | 17.76 | 20.17 | 0 | 18 | 0 | 0 | 0 | 0 | 0 | 0 | 0 | 26  | 2 |
| ENSMUSG00000075376  | 5331 | 28.81 | 37.14 | 16.39 | 17.65 | 1 | 25 | 1 | 0 | 0 | 0 | 0 | 0 | 2 | 124 | 1 |
| ENSMUSG00000018427  | 4174 | 25.92 | 28.75 | 22.35 | 22.98 | 1 | 4  | 0 | 0 | 0 | 0 | 0 | 0 | 1 | 32  | 0 |
| ENSMUSG00000004364  | 338  | 31.07 | 33.73 | 18.64 | 16.57 | 0 | 2  | 0 | 0 | 0 | 0 | 0 | 0 | 0 | 0   | 0 |
| ENSMUSG00000039542  | 3291 | 27.20 | 28.90 | 22.27 | 21.63 | 0 | 2  | 0 | 0 | 0 | 0 | 0 | 0 | 0 | 86  | 2 |
| ENSMUSG00000041216  | 2214 | 31.80 | 28.68 | 22.27 | 17.25 | 0 | 7  | 0 | 0 | 0 | 0 | 0 | 0 | 0 | 0   | 0 |
| ENSMUSG00000038806  | 1804 | 23.12 | 37.64 | 19.29 | 19.96 | 0 | 2  | 0 | 0 | 0 | 0 | 0 | 0 | 0 | 14  | 0 |
| ENSMUSG00000032640  | 1367 | 24.51 | 35.11 | 20.04 | 20.34 | 1 | 5  | 1 | 1 | 0 | 0 | 1 | 2 | 2 | 29  | 0 |
| ENSMUSG00000021711  | 184  | 32.07 | 39.67 | 13.59 | 14.67 | 0 | 1  | 0 | 1 | 0 | 0 | 0 | 0 | 0 | 0   | 0 |
| ENSMUSG00000031517  | 1942 | 28.89 | 37.59 | 15.60 | 17.92 | 0 | 6  | 0 | 0 | 0 | 0 | 0 | 0 | 0 | 3   | 0 |
| ENSMUSG00000050192  | 4391 | 29.01 | 34.39 | 18.04 | 18.56 | 0 | 10 | 0 | 0 | 0 | 0 | 0 | 0 | 1 | 21  | 3 |





|                     |      |       |       |       |       |   |    |   |   |   |   |   |   |    |   |
|---------------------|------|-------|-------|-------|-------|---|----|---|---|---|---|---|---|----|---|
| ENSMUSG00000046785  | 2347 | 29.02 | 33.45 | 17.77 | 19.77 | 0 | 6  | 0 | 0 | 0 | 0 | 0 | 0 | 12 | 0 |
| ENSMUSG00000048109  | 334  | 28.14 | 35.03 | 15.57 | 21.26 | 0 | 0  | 0 | 0 | 0 | 0 | 0 | 0 | 0  | 0 |
| ENSMUSG00000038280  | 1917 | 29.47 | 32.13 | 17.79 | 20.61 | 0 | 8  | 0 | 0 | 0 | 0 | 0 | 0 | 1  | 0 |
| ENSMUSG00000024286  | 2512 | 26.31 | 34.04 | 18.75 | 20.90 | 0 | 3  | 0 | 0 | 0 | 0 | 0 | 0 | 11 | 0 |
| ENSMUSG000000074212 | 115  | 23.48 | 33.91 | 21.74 | 20.87 | 0 | 0  | 0 | 0 | 0 | 0 | 0 | 0 | 0  | 0 |
| ENSMUSG00000045180  | 3019 | 28.59 | 32.36 | 19.77 | 19.28 | 0 | 11 | 1 | 1 | 0 | 0 | 0 | 0 | 10 | 2 |
| ENSMUSG00000014956  | 1692 | 29.26 | 38.00 | 15.43 | 17.32 | 0 | 4  | 0 | 0 | 0 | 0 | 0 | 0 | 31 | 1 |
| ENSMUSG00000024268  | 641  | 28.71 | 22.00 | 22.93 | 26.37 | 0 | 2  | 0 | 1 | 0 | 0 | 0 | 0 | 0  | 0 |
| ENSMUSG000000052852 | 2901 | 25.09 | 29.16 | 22.34 | 23.41 | 0 | 3  | 0 | 0 | 0 | 0 | 0 | 0 | 0  | 0 |
| ENSMUSG00000021770  | 5484 | 27.68 | 31.55 | 19.06 | 21.72 | 0 | 6  | 0 | 0 | 0 | 0 | 0 | 0 | 89 | 4 |
| ENSMUSG00000031010  | 3844 | 28.41 | 35.67 | 17.07 | 18.86 | 0 | 10 | 0 | 0 | 0 | 0 | 0 | 0 | 11 | 1 |
| ENSMUSG00000027357  | 861  | 34.03 | 31.48 | 15.80 | 18.70 | 0 | 0  | 0 | 0 | 0 | 0 | 0 | 0 | 37 | 0 |
| ENSMUSG000000041670 | 2171 | 28.88 | 31.74 | 20.27 | 19.12 | 0 | 4  | 0 | 0 | 0 | 0 | 0 | 0 | 37 | 1 |
| ENSMUSG00000037138  | 2123 | 24.49 | 31.61 | 23.32 | 20.58 | 0 | 4  | 0 | 0 | 0 | 0 | 0 | 0 | 21 | 0 |
| ENSMUSG00000025986  | 2409 | 27.48 | 34.83 | 18.76 | 18.93 | 0 | 6  | 0 | 0 | 0 | 0 | 0 | 1 | 4  | 1 |
| ENSMUSG00000027806  | 6519 | 32.69 | 32.21 | 16.89 | 18.21 | 1 | 17 | 0 | 0 | 0 | 0 | 0 | 0 | 19 | 0 |
| ENSMUSG000000073093 | 1119 | 27.52 | 31.55 | 20.91 | 20.02 | 0 | 1  | 0 | 0 | 0 | 0 | 0 | 0 | 13 | 0 |
| ENSMUSG00000036712  | 4928 | 25.55 | 31.70 | 18.67 | 24.09 | 1 | 12 | 0 | 0 | 0 | 0 | 0 | 0 | 3  | 0 |
| ENSMUSG00000029467  | 2041 | 28.12 | 33.37 | 19.06 | 19.45 | 0 | 9  | 1 | 0 | 0 | 0 | 1 | 1 | 0  | 0 |
| ENSMUSG00000035268  | 622  | 21.54 | 26.85 | 28.30 | 23.31 | 0 | 1  | 0 | 0 | 0 | 0 | 0 | 0 | 8  | 0 |
| ENSMUSG000000041459 | 4547 | 28.17 | 31.76 | 19.07 | 21.00 | 0 | 11 | 0 | 0 | 0 | 0 | 0 | 0 | 7  | 0 |
| ENSMUSG000000071708 | 2282 | 29.54 | 31.95 | 17.57 | 20.95 | 0 | 7  | 0 | 0 | 0 | 0 | 0 | 1 | 1  | 0 |
| ENSMUSG00000024241  | 4429 | 30.03 | 32.85 | 18.27 | 18.85 | 0 | 10 | 0 | 0 | 0 | 0 | 0 | 0 | 15 | 1 |
| ENSMUSG00000036617  | 4062 | 27.79 | 25.01 | 25.28 | 21.91 | 0 | 3  | 0 | 0 | 0 | 0 | 0 | 0 | 33 | 0 |
| ENSMUSG000000028557 | 1352 | 28.33 | 35.95 | 15.53 | 20.19 | 0 | 3  | 0 | 0 | 0 | 0 | 0 | 0 | 0  | 0 |
| ENSMUSG00000068823  | 1252 | 29.07 | 34.11 | 18.05 | 18.77 | 0 | 8  | 0 | 0 | 0 | 0 | 0 | 1 | 9  | 0 |
| ENSMUSG00000073563  | 2385 | 27.80 | 33.54 | 18.95 | 19.71 | 0 | 8  | 0 | 0 | 0 | 0 | 0 | 0 | 2  | 0 |
| ENSMUSG000000057894 | 5044 | 29.38 | 32.34 | 17.19 | 21.09 | 3 | 13 | 1 | 0 | 0 | 0 | 0 | 3 | 89 | 2 |
| ENSMUSG000000056851 | 363  | 27.00 | 40.22 | 17.08 | 15.70 | 0 | 1  | 0 | 0 | 0 | 0 | 0 | 0 | 11 | 0 |
| ENSMUSG00000030556  | 1695 | 25.07 | 29.32 | 22.95 | 22.65 | 0 | 4  | 0 | 0 | 0 | 0 | 0 | 0 | 18 | 0 |
| ENSMUSG00000041365  | 98   | 28.57 | 39.80 | 17.35 | 14.29 | 0 | 0  | 0 | 0 | 0 | 0 | 0 | 0 | 0  | 0 |
| ENSMUSG00000022698  | 1051 | 27.40 | 37.30 | 17.03 | 18.27 | 0 | 2  | 0 | 0 | 0 | 0 | 0 | 0 | 21 | 0 |
| ENSMUSG000000027940 | 1285 | 24.28 | 28.33 | 25.91 | 21.48 | 0 | 2  | 0 | 0 | 0 | 0 | 0 | 0 | 5  | 0 |
| ENSMUSG00000045973  | 3318 | 23.42 | 31.04 | 21.79 | 23.75 | 0 | 4  | 0 | 0 | 0 | 0 | 0 | 0 | 51 | 2 |
| ENSMUSG00000018379  | 4488 | 29.92 | 34.14 | 15.78 | 20.16 | 0 | 10 | 0 | 0 | 0 | 0 | 0 | 1 | 2  | 0 |
| ENSMUSG00000033411  | 2963 | 29.02 | 36.15 | 16.23 | 18.60 | 1 | 8  | 1 | 0 | 0 | 0 | 0 | 1 | 6  | 0 |
| ENSMUSG000000079658 | 520  | 34.23 | 37.12 | 13.27 | 15.38 | 0 | 1  | 0 | 1 | 0 | 0 | 0 | 0 | 2  | 0 |
| ENSMUSG000000029390 | 1291 | 24.86 | 35.63 | 18.44 | 21.07 | 0 | 5  | 0 | 0 | 0 | 0 | 0 | 2 | 3  | 2 |
| ENSMUSG00000035847  | 3747 | 27.57 | 34.80 | 20.10 | 17.53 | 0 | 12 | 0 | 0 | 0 | 0 | 0 | 1 | 6  | 0 |
| ENSMUSG00000044071  | 3276 | 26.16 | 28.30 | 21.70 | 23.84 | 0 | 6  | 0 | 0 | 0 | 0 | 0 | 0 | 22 | 0 |
| ENSMUSG000000028879 | 1104 | 26.54 | 34.33 | 18.21 | 20.92 | 0 | 5  | 0 | 0 | 0 | 0 | 0 | 0 | 0  | 0 |
| ENSMUSG000000027663 | 6692 | 22.21 | 32.08 | 23.27 | 22.44 | 0 | 8  | 0 | 0 | 0 | 0 | 0 | 0 | 89 | 2 |
| ENSMUSG00000029673  | 1648 | 27.79 | 28.09 | 20.69 | 23.42 | 0 | 3  | 0 | 0 | 0 | 0 | 0 | 0 | 38 | 0 |
| ENSMUSG00000051412  | 1407 | 33.40 | 36.60 | 14.29 | 15.71 | 1 | 6  | 1 | 0 | 0 | 0 | 0 | 0 | 37 | 0 |
| ENSMUSG00000024462  | 406  | 21.18 | 31.03 | 23.40 | 24.38 | 0 | 0  | 0 | 0 | 0 | 0 | 0 | 0 | 0  | 0 |
| ENSMUSG000000078578 | 818  | 29.71 | 34.35 | 18.09 | 17.85 | 1 | 2  | 0 | 0 | 0 | 0 | 0 | 0 | 9  | 0 |
| ENSMUSG00000015749  | 315  | 25.71 | 38.10 | 18.10 | 18.10 | 0 | 1  | 0 | 0 | 0 | 0 | 0 | 0 | 0  | 0 |
| ENSMUSG00000037999  | 1822 | 28.65 | 35.68 | 15.86 | 19.81 | 0 | 8  | 0 | 0 | 0 | 0 | 0 | 0 | 16 | 0 |
| ENSMUSG00000024935  | 2059 | 27.39 | 29.63 | 21.86 | 21.13 | 0 | 5  | 0 | 0 | 0 | 0 | 0 | 0 | 21 | 0 |
| ENSMUSG000000060475 | 665  | 25.41 | 42.11 | 14.74 | 17.74 | 0 | 2  | 0 | 0 | 0 | 0 | 0 | 0 | 48 | 0 |
| ENSMUSG00000029840  | 312  | 29.17 | 27.24 | 18.27 | 25.32 | 0 | 0  | 0 | 0 | 0 | 0 | 0 | 0 | 0  | 0 |
| ENSMUSG00000029048  | 553  | 25.50 | 30.38 | 19.53 | 24.59 | 0 | 1  | 0 | 0 | 0 | 0 | 0 | 0 | 0  | 0 |
| ENSMUSG00000025810  | 533  | 23.26 | 25.14 | 25.89 | 25.70 | 0 | 0  | 0 | 0 | 0 | 0 | 0 | 0 | 0  | 0 |
| ENSMUSG000000024614 | 3071 | 31.88 | 36.93 | 13.84 | 17.36 | 0 | 14 | 0 | 0 | 0 | 0 | 0 | 2 | 2  | 0 |
| ENSMUSG00000068854  | 1559 | 21.36 | 34.06 | 22.77 | 21.81 | 0 | 6  | 0 | 0 | 0 | 0 | 0 | 0 | 18 | 0 |
| ENSMUSG00000000197  | 1527 | 31.30 | 33.86 | 16.37 | 18.47 | 0 | 3  | 0 | 0 | 0 | 0 | 0 | 0 | 7  | 0 |
| ENSMUSG00000049583  | 3261 | 32.32 | 32.35 | 17.91 | 17.42 | 0 | 11 | 0 | 0 | 0 | 0 | 0 | 0 | 37 | 2 |
| ENSMUSG000000078653 | 1120 | 29.55 | 32.50 | 19.73 | 18.21 | 0 | 1  | 0 | 0 | 0 | 0 | 0 | 0 | 26 | 0 |
| ENSMUSG00000029131  | 673  | 28.83 | 35.51 | 15.75 | 19.91 | 0 | 3  | 0 | 0 | 0 | 0 | 0 | 0 | 0  | 0 |
| ENSMUSG00000030286  | 1016 | 25.69 | 27.26 | 22.64 | 24.41 | 0 | 1  | 0 | 0 | 0 | 0 | 0 | 0 | 0  | 0 |
| ENSMUSG00000057335  | 2017 | 28.51 | 37.48 | 16.96 | 17.06 | 2 | 9  | 1 | 0 | 0 | 0 | 1 | 2 | 46 | 1 |









|                     |      |       |       |       |       |   |    |   |   |   |   |   |   |    |    |
|---------------------|------|-------|-------|-------|-------|---|----|---|---|---|---|---|---|----|----|
| ENSMUSG00000028098  | 878  | 30.64 | 33.60 | 18.22 | 17.54 | 0 | 2  | 0 | 1 | 0 | 0 | 0 | 0 | 0  | 0  |
| ENSMUSG00000038344  | 1686 | 25.27 | 34.52 | 19.45 | 20.76 | 1 | 6  | 0 | 0 | 0 | 0 | 0 | 0 | 1  | 14 |
| ENSMUSG00000078812  | 633  | 18.64 | 27.65 | 29.38 | 24.33 | 0 | 1  | 0 | 0 | 0 | 0 | 0 | 0 | 0  | 0  |
| ENSMUSG00000034557  | 1793 | 25.66 | 30.95 | 23.31 | 20.08 | 0 | 3  | 0 | 0 | 0 | 0 | 0 | 0 | 6  | 1  |
| ENSMUSG00000043223  | 163  | 22.70 | 37.42 | 19.02 | 20.86 | 0 | 0  | 0 | 0 | 0 | 0 | 0 | 0 | 0  | 0  |
| ENSMUSG00000029470  | 1425 | 21.96 | 27.79 | 25.75 | 24.49 | 0 | 0  | 0 | 0 | 0 | 0 | 0 | 0 | 1  | 1  |
| ENSMUSG00000029206  | 164  | 39.63 | 23.17 | 16.46 | 20.73 | 0 | 0  | 0 | 0 | 0 | 0 | 0 | 0 | 0  | 0  |
| ENSMUSG00000023147  | 1157 | 22.99 | 32.50 | 21.87 | 22.64 | 0 | 2  | 0 | 0 | 0 | 0 | 0 | 0 | 40 | 0  |
| ENSMUSG00000019907  | 388  | 31.70 | 23.71 | 21.39 | 23.20 | 0 | 0  | 0 | 0 | 0 | 0 | 0 | 0 | 0  | 0  |
| ENSMUSG00000049225  | 2389 | 31.56 | 36.00 | 14.90 | 17.54 | 1 | 9  | 0 | 0 | 0 | 0 | 0 | 0 | 16 | 0  |
| ENSMUSG00000059486  | 1701 | 25.93 | 33.27 | 19.11 | 21.69 | 0 | 3  | 0 | 0 | 0 | 0 | 0 | 0 | 1  | 33 |
| ENSMUSG00000064061  | 113  | 27.43 | 31.86 | 18.58 | 22.12 | 0 | 1  | 0 | 0 | 0 | 0 | 0 | 0 | 0  | 0  |
| ENSMUSG00000035236  | 8796 | 30.13 | 35.63 | 16.46 | 17.78 | 0 | 22 | 0 | 0 | 0 | 0 | 0 | 0 | 17 | 1  |
| ENSMUSG00000029836  | 1271 | 28.87 | 35.17 | 14.63 | 21.32 | 1 | 8  | 0 | 1 | 0 | 0 | 0 | 1 | 38 | 0  |
| ENSMUSG00000028161  | 552  | 32.07 | 32.07 | 15.22 | 20.65 | 0 | 1  | 0 | 0 | 0 | 0 | 0 | 0 | 2  | 0  |
| ENSMUSG00000031642  | 2235 | 26.58 | 31.23 | 19.51 | 22.68 | 0 | 2  | 0 | 0 | 0 | 0 | 0 | 0 | 28 | 0  |
| ENSMUSG000000066551 | 1507 | 26.74 | 37.89 | 16.39 | 18.98 | 0 | 3  | 0 | 0 | 0 | 0 | 0 | 0 | 44 | 0  |
| ENSMUSG00000022122  | 2441 | 31.18 | 29.86 | 20.48 | 18.48 | 0 | 3  | 0 | 0 | 0 | 0 | 0 | 0 | 18 | 0  |
| ENSMUSG00000049672  | 2541 | 26.68 | 33.45 | 18.77 | 21.09 | 0 | 3  | 0 | 0 | 0 | 0 | 0 | 0 | 16 | 0  |
| ENSMUSG00000027104  | 2413 | 28.68 | 36.26 | 15.71 | 19.35 | 0 | 5  | 0 | 0 | 0 | 0 | 0 | 0 | 5  | 0  |
| ENSMUSG00000040760  | 4740 | 26.86 | 34.73 | 18.33 | 20.08 | 0 | 14 | 0 | 0 | 0 | 0 | 0 | 0 | 14 | 0  |
| ENSMUSG00000075259  | 2336 | 28.42 | 32.32 | 20.33 | 18.92 | 0 | 4  | 0 | 0 | 0 | 0 | 0 | 0 | 3  | 0  |
| ENSMUSG00000029635  | 1173 | 27.37 | 31.88 | 17.90 | 22.85 | 1 | 2  | 0 | 0 | 0 | 0 | 0 | 1 | 0  | 0  |
| ENSMUSG00000021710  | 1889 | 27.05 | 32.24 | 19.96 | 20.75 | 0 | 2  | 0 | 0 | 0 | 0 | 0 | 1 | 11 | 0  |
| ENSMUSG00000071076  | 532  | 15.04 | 27.26 | 32.33 | 25.38 | 0 | 1  | 0 | 0 | 0 | 0 | 0 | 0 | 3  | 0  |
| ENSMUSG00000040003  | 2642 | 26.31 | 26.34 | 24.68 | 22.67 | 0 | 6  | 0 | 0 | 0 | 0 | 0 | 0 | 0  | 0  |
| ENSMUSG00000024975  | 709  | 27.79 | 38.08 | 15.37 | 18.76 | 0 | 0  | 0 | 0 | 0 | 0 | 0 | 0 | 69 | 0  |
| ENSMUSG00000024068  | 2801 | 28.38 | 33.81 | 18.42 | 19.39 | 0 | 4  | 0 | 0 | 0 | 0 | 0 | 0 | 0  | 0  |
| ENSMUSG00000046873  | 3101 | 30.67 | 32.34 | 17.90 | 19.09 | 0 | 4  | 0 | 0 | 0 | 0 | 0 | 0 | 0  | 0  |
| ENSMUSG00000028546  | 2610 | 33.83 | 34.18 | 14.14 | 17.85 | 1 | 9  | 1 | 0 | 0 | 0 | 1 | 0 | 28 | 0  |

Number sequences with ARE (ARED): 108  
 Number sequences with AUUUA: 495  
 Number sequences with overlapping AUUUA: 51  
 Number sequences with ARE type I: 38  
 Number sequences with ARE type IIA: 1  
 Number sequences with ARE type IIB: 1  
 Number sequences with ARE type IIC: 4  
 Number sequences with ARE type IID: 18  
 Number sequences with ARE type IIE: 116  
 Number sequences with U-rich: 370  
 Number sequences with GRE motif: 106  
 Total number of sequences: 572

Percentage of sequences with ARE (ARED): 18.8811188811189  
 Percentage of sequences with AUUUA: 86.5384615384615  
 Percentage of sequences with overlapping AUUUA: 8.91608391608392  
 Percentage of sequences with ARE group I: 6.64335664335664  
 Percentage of sequences with ARE group IIA: 0.174825174825175  
 Percentage of sequences with ARE group IIB: 0.174825174825175  
 Percentage of sequences with ARE group IIC: 0.699300699300699  
 Percentage of sequences with ARE group IID: 3.14685314685315  
 Percentage of sequences with ARE group IIE: 20.2797202797203  
 Percentage of sequences with U-rich: 64.6853146853147  
 Percentage of sequences with GRE motif: 18.5314685314685
