# Supplementary material for: Novel recognition motifs and biological functions of the RNA-binding protein HuD revealed by genome-wide identification of its targets
Source: PubMed Central journal article supplement — Nucleic Acids Res. 2009 Oct 21;38(1):117–30. doi: 10.1093/nar/gkp863 (PMC2800223; doi:10.1093/nar/gkp863), 2009-10-21
Supplement: gkp863_2.pdf [file gkp863_2.pdf]

**Supplementary Table 2. Probability matrices for HuD binding motifs.**

**Motif 1**

ALPHABET= ACGT

log-odds matrix: alength= 4 w= 13 n= 22490 bayes= 9.94457 E= 5.1e-041

|       |      |       |       |
|-------|------|-------|-------|
| -233  | 194  | 56    | -1229 |
| -175  | 168  | -1229 | -51   |
| -1229 | 198  | -1229 | -93   |
| -233  | -127 | -1229 | 95    |
| -1229 | 205  | 27    | -451  |
| -1229 | 205  | -1229 | -119  |
| -1229 | 194  | -1229 | -81   |
| -101  | -168 | -1229 | 88    |
| -1229 | 225  | -1229 | -251  |
| -233  | 112  | -1229 | 24    |
| -333  | 222  | -190  | -351  |
| -133  | 90   | -290  | 24    |
| -333  | 212  | -9    | -1229 |

**Motif 2**

ALPHABET= ACGT

log-odds matrix: alength= 4 w= 13 n= 22490 bayes= 9.30091 E= 1.5e-034

|       |       |       |      |
|-------|-------|-------|------|
| -1229 | -1229 | 91    | 66   |
| -1229 | -1229 | -1229 | 113  |
| -1229 | -1229 | -1229 | 113  |
| -1229 | -1229 | -290  | 110  |
| -1229 | -1229 | 259   | -219 |
| -1229 | -1229 | -1229 | 113  |
| -1229 | -1229 | -1229 | 113  |
| -1229 | -1229 | -1229 | 113  |
| -1229 | -1229 | 56    | 77   |
| -1229 | -127  | 206   | -61  |
| -1229 | -1229 | -1229 | 113  |
| -1229 | -1229 | -1229 | 113  |
| -1229 | -1229 | -1229 | 113  |

**Motif 3**

ALPHABET= ACGT

log-odds matrix: alength= 4 w= 13 n= 22490 bayes= 9.32547 E= 5.4e-015

|       |       |       |       |
|-------|-------|-------|-------|
| -7    | -1220 | -281  | 79    |
| -1220 | -218  | -49   | 90    |
| -224  | -218  | -1220 | 100   |
| -1220 | -1220 | -1220 | 113   |
| -324  | -60   | -81   | 75    |
| -24   | -18   | -281  | 48    |
| -1220 | -86   | -1220 | 97    |
| -1220 | -1220 | -1220 | 113   |
| -1220 | -1220 | -1220 | 113   |
| 101   | -318  | -122  | 16    |
| 231   | -1220 | -1220 | -1220 |
| 231   | -1220 | -1220 | -1220 |
| 218   | -1220 | -81   | -1220 |
